# Supplementary figures and images for: In vitro evaluation of biodegradable magnesium alloys containing micro-alloying additions of strontium, with and without zinc
Source: Royal Society of Chemistry journal article supplement (doi:10.1039/c5tb01516b), 2015-01-01

### Supplementary Information

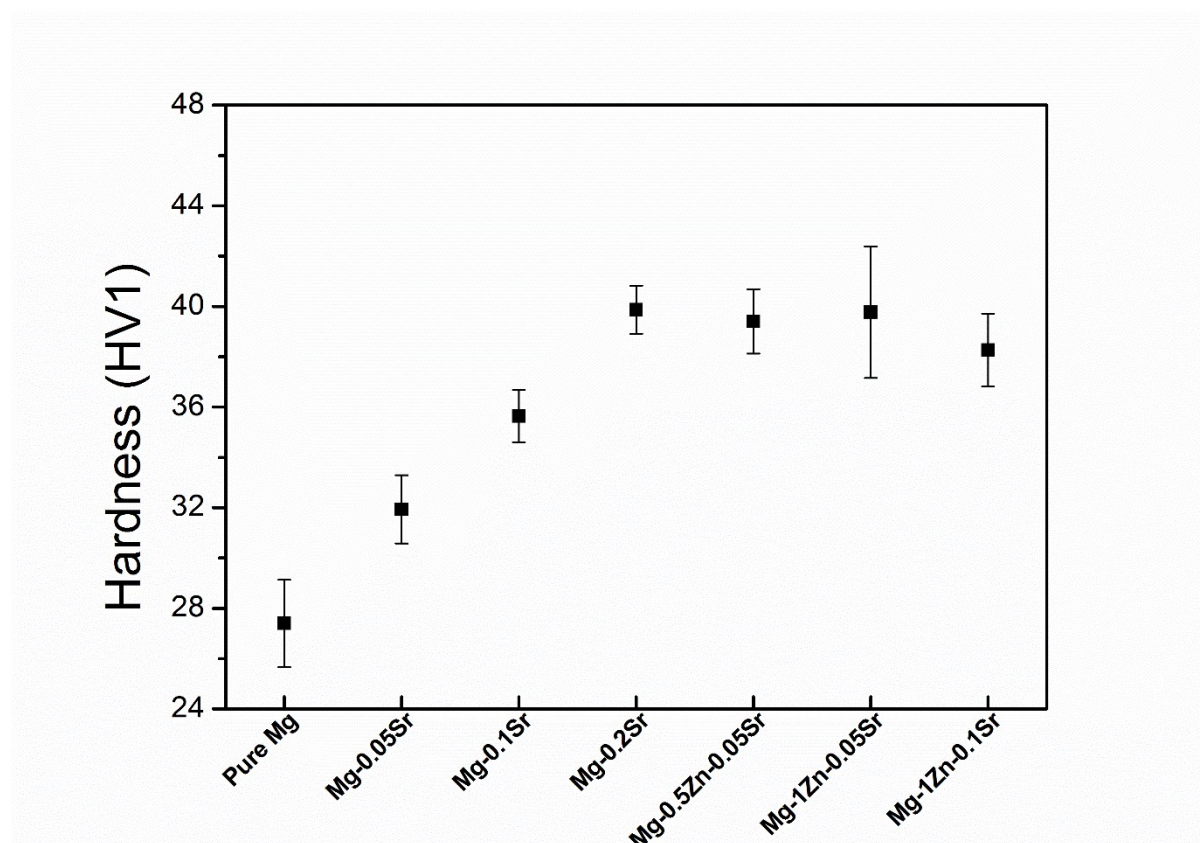

Figure 1# Microhardness of Mg alloys

Supplement: c5tb01516b1.pdf [file c5tb01516b1.pdf]
